# Supplementary material
Source: MDPI journal article supplement (https://www.mdpi.com/2077-0472/11/3/189)
Supplement: s1 [file s1]

## Sheet: soil_carbon
plot	core	depth_cm	per_c	soil_mass_Mg_ha	C_mass_Mg_ha		depth	Depth of core increment (cm)
1	1	0-20	1.715	1204.28	20.6534		per_c	Measured total organic carbon concentration (%)
1	1	20-40	0.96	1704.76	16.3657		soil_mass_Mg_ha	Mass of soil collected from core increment, scaled up to ha from core radius (3.799 cm2) to Mg soil/ha
1	1	40-60	0.55	1704.41	9.37423		C_Mass_Mg_ha	Mass of soil carbon (Mg C per ha)
1	1	60-80	0.445	1817.61	8.08838
1	1	80-100	0.295	1554.88	4.58688
1	2	0-20	7.02	717.242	50.3504
1	2	20-40	4.535	1489.86	67.5652
1	2	40-60	3.09	1506.26	46.5435
1	2	60-80	2.17	1691.1	36.6968
1	2	80-100	1.695	1407.02	23.849
1	3	0-20	6.855	888.019	60.8737
1	3	20-40	1.83	1798.13	32.9058
1	3	40-60	1.87	2537.15	47.4447
1	3	60-80	1.27	2097.23	26.6348
1	3	80-100	0.99	1979.95	19.6015
1	4	0-20	5.475	770.46	42.1827
1	4	20-40	1.82	1737.38	31.6204
1	4	40-60	0.89	695.122	6.18658
1	4	60-80	0.73	1346.17	9.82707
1	4	80-100	0.435	1374.45	5.97887
1	5	0-20	5.96	870.067	51.856
1	5	20-40	2.42	1578.25	38.1935
1	5	40-60	1.21	1745.62	21.122
1	5	60-80	0.365	1649.24	6.01974
1	5	80-100	0.49	1423.43	6.97482
1	6	0-20	5.875	979.855	57.5665
1	6	20-40	0.34	1478.74	5.02772
1	6	40-60	0.57	1718.59	9.79594
1	6	60-80	1.49	985.081	14.6777
1	6	80-100	0.23	1389.28	3.19535
1	7	0-20	4.885	1059.99	51.7807
1	7	20-40	1.2	1283.23	15.3987
1	7	40-60	0.575	1715.56	9.86447
1	7	60-80	0.575	1609.44	9.25427
1	7	80-100	0.535	739.677	3.95727
1	8	0-20	7.515	784.131	58.9275
1	8	20-40	2.15	1418.02	30.4875
1	8	40-60	1.145	1949.46	22.3213
1	8	60-80	0.78	1753.64	13.6784
1	8	80-100	1.105	1837.32	20.3024
1	9	0-20	5.62	846.641	47.5812
1	9	20-40	2.06	1313.38	27.0557
1	9	40-60	1.325	2011.03	26.6462
1	9	60-80	1.28	1648.38	21.0993
1	9	80-100	2.93	1605.25	47.0338
1	10	0-20	6.645	1091.19	72.5095
1	10	20-40	3.245	1711.79	55.5475
1	10	40-60	1.265	1764.71	22.3236
1	10	60-80	1.82	770.306	14.0196
1	10	80-100	0.63	1404.61	8.84902
1	11	0-20	5.92	714.32	42.2877
1	11	20-40	2.15	2019.93	43.4286
1	11	40-60	1.11	1766.8	19.6115
1	11	60-80	1.155	1555.73	17.9686
1	11	80-100	1.085	1451.56	15.7494
1	12	0-20	5.64	719.064	40.5552
1	12	20-40	1.945	1846.53	35.915
1	12	40-60	1.05	2013.65	21.1434
1	12	60-80	1.065	1796.58	19.1336
1	12	80-100	0.89	864.041	7.68996
1	13	0-20	4.495	1104.69	49.656
1	13	20-40	2.9	1653.37	47.9478
1	13	40-60	2.43	1724.6	41.9077
1	13	60-80	1.405	1688.83	23.728
1	13	80-100	1.345	1636.44	22.0101
1	14	0-20	5.63	833.397	46.9203
1	14	20-40	4.655	695.174	32.3604
1	14	40-60	2.275	1880.26	42.776
1	14	60-80	2.21	1887.28	41.7088
1	14	80-100	1.985	1157.97	22.9856
1	15	0-20	7.795	1113.47	86.7951
1	15	20-40	4.3	1617.63	69.558
1	15	40-60	2.71	1778.52	48.1978
1	15	60-80	2.24	1413.71	31.6671
1	15	80-100	1.31	1133.78	14.8525
1	16	0-20	7.1	952.034	67.5944
1	16	20-40	4.72	1425.67	67.2915
1	16	40-60	2.73	1831.62	50.0032
1	16	60-80	2.49	1002.86	24.9713
1	16	80-100	2.165	1501.87	32.5155
2	1	0-20	6.92	770.583	53.3243
2	1	20-40	2.325	1382.12	32.1343
2	1	40-60	0.735	1397.07	10.2684
2	1	60-80	0.635	1586.88	10.0767
2	1	80-100	0.18	1732.48	3.11846
2	2	0-20	4.365	565.694	24.6926
2	2	20-40	1.25	702.17	8.77713
2	2	40-60	1.465	769.161	11.2682
2	2	60-80	0.54	783.584	4.23135
2	2	80-100	0.73	1206.14	8.8048
2	3	0-20	4.64	789.439	36.63
2	3	20-40	1.63	1546.24	25.2038
2	3	40-60	1.84	1176.82	21.6535
2	3	60-80	1.17	900.972	10.5414
2	3	80-100	0.565	529.893	2.99389
2	4	0-20	8.185	371.864	30.4371
2	4	20-40	3.25	1128	36.66
2	4	40-60	2.45	1360.77	33.3388
2	4	60-80	1.56	2132.5	33.2671
2	4	80-100	0.915	2199.89	20.129
2	5	0-20	5.665	890.352	50.4385
2	5	20-40	4.04	1412.23	57.0542
2	5	40-60	1.675	1910.52	32.0012
2	5	60-80	1.4	2042.17	28.5904
2	5	80-100	2.91	2412.84	70.2137
2	6	0-20	6.41	997.179	63.9192
2	6	20-40	2.675	1142.85	30.5714
2	6	40-60	2.04	630.313	12.8584
2	6	60-80	0.49	1006.66	4.93263
2	6	80-100	0.23	1765.22	4.06
2	7	0-20	5.055	748.05	37.8139
2	7	20-40	1.965	1400.43	27.5185
2	7	40-60	1.725	1712.69	29.544
2	7	60-80	0.65	1830.89	11.9008
2	7	80-100	0.685	1724.63	11.8137
2	8	0-20	7.785	900.533	70.1065
2	8	20-40	2.785	1409.26	39.2479
2	8	40-60	1.89	1056.2	19.9623
2	8	60-80	1.92	1567.55	30.0969
2	8	80-100	1.045	1700.92	17.7746
2	9	0-20	5.43	826.002	44.8519
2	9	20-40	2.14	1413.09	30.2401
2	9	40-60	1.905	1458.22	27.779
2	9	60-80	2.37	1056.45	25.038
2	9	80-100	0.75	1163.69	8.7277
2	10	0-20	5.185	1024.39	53.1146
2	10	20-40	3.16	1459.61	46.1237
2	10	40-60	2.585	1285.02	33.2177
2	10	60-80	2.23	1310.92	29.2334
2	10	80-100	1.53	1112.59	17.0227
2	11	0-20	5.83	784.725	45.7495
2	11	20-40	4.105	699.951	28.733
2	11	40-60	2.19	1419.21	31.0808
2	11	60-80	1.31	1031.84	13.5171
2	11	80-100	1.13	831.743	9.3987
2	12	0-20	6.145	761.048	46.7664
2	12	20-40	3.705	900.046	33.3467
2	12	40-60	2.4	1419.64	34.0714
2	12	60-80	2	1007.79	20.1559
2	12	80-100	1.69	849.373	14.3544
2	13	0-20	5.73	914.629	52.4083
2	13	20-40	1.78	1506.78	26.8206
2	13	40-60	2.925	1579.01	46.186
2	13	60-80	1.44	417.376	6.01021
2	13	80-100	1.66	946.695	15.7151
2	14	0-20	6.165	583.064	35.9459
2	14	20-40	2.645	1716.7	45.4068
2	14	40-60	1.825	1791.44	32.6938
2	14	60-80	1.39	1464.34	20.3544
2	14	80-100	1.27	397.74	5.0513
2	15	0-20	6.01	907.328	54.5304
2	15	20-40	3.095	1584.94	49.054
2	15	40-60	1.845	1391.34	25.6703
2	15	60-80	1.4	763.358	10.687
2	15	80-100	1.91	615.361	11.7534
2	16	0-20	6.145	978.46	60.1264
2	16	20-40	3.58	1419.27	50.8099
2	16	40-60	1.965	1918.47	37.698
2	16	60-80	1.945	1602.55	31.1696
2	16	80-100	1.575	1557.4	24.5291
3	1	0-20	5.68	996.731	56.6143
3	1	20-40	3.36	1593.17	53.5306
3	1	40-60	1.99	1365.7	27.1775
3	1	60-80	1.46	1619.42	23.6435
3	1	80-100	1.37	1636.45	22.4193
3	2	0-20	4.44	974.16	43.2527
3	2	20-40	3.315	1664.75	55.1863
3	2	40-60	1.74	1128.34	19.6331
3	2	60-80	1.255	1022.27	12.8294
3	2	80-100	0.97	854.422	8.28789
3	3	0-20	5.985	1312.85	78.5739
3	3	20-40	2.82	1602.7	45.1961
3	3	40-60	2.3	1215.3	27.9518
3	3	60-80	6.54	1528.88	99.9887
3	3	80-100	1.03	1749.22	18.017
3	4	0-20	4.4	1487.52	65.4509
3	4	20-40	1.495	1112.14	16.6265
3	4	40-60	2.56	1148.61	29.4045
3	4	60-80	2.17	1863.57	40.4395
3	4	80-100	0.75	2046.68	15.3501
3	5	0-20	6.73	501.955	33.7816
3	5	20-40	4.29	888.254	38.1061
3	5	40-60	1.305	1812.34	23.651
3	5	60-80	1.245	1591.11	19.8093
3	5	80-100	0.415	1687.6	7.00352
3	6	0-20	6.805	1002.26	68.2037
3	6	20-40	3.69	1189.73	43.9011
3	6	40-60	1.045	1659.94	17.3464
3	6	60-80	1.03	1504.42	15.4955
3	6	80-100	0.665	1254.28	8.34096
3	7	0-20	6.96	546.231	38.0177
3	7	20-40	4.26	879.368	37.4611
3	7	40-60	2.495	1556.18	38.8268
3	7	60-80	1.65	1691.39	27.908
3	7	80-100	1.405	997.866	14.02
3	8	0-20	6.46	845.619	54.627
3	8	20-40	4.495	992.711	44.6224
3	8	40-60	2.15	1833.68	39.4242
3	8	60-80	1.735	1960.95	34.0225
3	8	80-100	1.24	1599.11	19.8289
3	9	0-20	6.735	357.73	24.0931
3	9	20-40	4.76	1202.41	57.2349
3	9	40-60	2.85	479.372	13.6621
3	9	60-80	2.85	949.843	27.0705
3	9	80-100	1.035	1151.99	11.9231
3	10	0-20	7.15	700.841	50.1102
3	10	20-40	4.675	1116.36	52.1899
3	10	40-60	3.27	1233.14	40.3236
3	10	60-80	2.09	902.336	18.8588
3	10	80-100	1.71	754.956	12.9098
3	11	0-20	6.825	616.031	42.0441
3	11	20-40	5.605	605.714	33.9503
3	11	40-60	3.215	1700.27	54.6636
3	11	60-80	2.09	1284.65	26.8491
3	11	80-100	1.43	883.122	12.6286
3	12	0-20	5.635	935.879	52.7368
3	12	20-40	3.325	1122.04	37.3079
3	12	40-60	1.585	1483.31	23.5104
3	12	60-80	1.58	1074.16	16.9717
3	12	80-100	1	829.689	8.29689
3	13	0-20	7.215	283.065	20.4232
3	13	20-40	4.63	1016.06	47.0436
3	13	40-60	4.125	1499.56	61.8568
3	13	60-80	3.015	1121.1	33.8012
3	13	80-100	1.38	1042.79	14.3905
3	14	0-20	7.285	400.504	29.1767
3	14	20-40	6.025	1105.36	66.5982
3	14	40-60	3.53	935.793	33.0335
3	14	60-80	2.045	986.313	20.1701
3	14	80-100	1.94	1205.89	23.3943
3	15	0-20	7.11	769.253	54.6939
3	15	20-40	4.535	878.02	39.8182
3	15	40-60	3.065	1652.92	50.662
3	15	60-80	1.845	891.469	16.4476
3	15	80-100	1.36	1390.03	18.9043
3	16	0-20	5.735	661.643	37.9452
3	16	20-40	3.54	981.275	34.7371
3	16	40-60	2.29	1062.27	24.326
3	16	60-80	1.905	750.617	14.2993
3	16	80-100	1.255	697.348	8.75172

## Sheet: tree_carbon
plot	dbh_cm	sp	ρ	E	biomass_kg	carbon_kg	carbon_Mg	C_plot_Mg	C_plot_Mg/ha		dbh	diameter at breast height (cm)
1	5.8	citspi	0.75	0.7	6.29266	3.02048	0.00302048				sp	species of tree (see below)*
1	8.9	citspi	0.75	0.7	18.7924	9.02033	0.00902033				ρ	wood density (g/cm3) obtained at: http://db.worldagroforestry.org/
1	6.5	citspi	0.75	0.7	8.42826	4.04557	0.00404557				E	measure of environmental stress; obtained at http://chave.ups-tlse.fr/pantropical_allometry.htm
1	71.1	phodac	0.75	0.7	3252.8	1561.35	1.56135				biomass_kg	biomass of tree (kg)
1	68.4	samsam	0.52	0.7	2071.78	994.452	0.994452				carbon_kg	carbon of tree (kg) based on assumed 48% C; converted to Mg
1	9.7	schact	0.41	0.7	12.9699	6.22556	0.00622556				C_plot_Mg	Mg carbon per 12 m x 15 m plot
1	5.5	schat	0.41	0.7	3.04499	1.4616	0.0014616				C_Mg/Ha	carbon scaled to Mg/ha per plot
1	5.8	syzcum	0.7	0.7	5.88288	2.82378	0.00282378
1	69.1	syzcum	0.7	0.7	2838.18	1362.33	1.36233	3.94472	219.151		*species	ρ_wood_density
2	20.1	citspi	0.75	0.7	146.162	70.1579	0.0701579				schefflera actinophylla (schact)	0.41
2	28.2	schact	0.41	0.7	187.953	90.2173	0.0902173				Syzygium cumini (syzcum)	0.7
2	7.4	schact	0.41	0.7	6.51286	3.12617	0.00312617				Citharexylum spinosum (citspi)	0.7
2	15.7	schact	0.41	0.7	43.7029	20.9774	0.0209774				Samanea samsam (samsam)	0.52
2	41.1	syzcum	0.7	0.7	800.867	384.416	0.384416				Phoenix dactylifera (phodac)	0.56
2	34.6	syzcum	0.7	0.7	524.736	251.873	0.251873
2	73.7	syzcum	0.7	0.7	3316.75	1592.04	1.59204
2	42.1	syzcum	0.7	0.7	849.453	407.738	0.407738
2	40.1	syzcum	0.7	0.7	753.937	361.89	0.36189
2	20.5	syzcum	0.7	0.7	143.524	68.8917	0.0688917
2	24.2	syzcum	0.7	0.7	216.856	104.091	0.104091
2	23.5	syzcum	0.7	0.7	201.612	96.7737	0.0967737
2	31.7	syzcum	0.7	0.7	422.94	203.011	0.203011	3.6552	203.067
3	32.1	schact	0.41	0.7	258.803	124.225	0.124225
3	13.1	schact	0.41	0.7	27.7242	13.3076	0.0133076
3	13.1	schact	0.41	0.7	27.7242	13.3076	0.0133076
3	41.7	syzcum	0.7	0.7	829.819	398.313	0.398313
3	38	syzcum	0.7	0.7	660.71	317.141	0.317141
3	43.4	syzcum	0.7	0.7	915.119	439.257	0.439257
3	44.5	syzcum	0.7	0.7	972.915	466.999	0.466999
3	27.6	syzcum	0.7	0.7	300.387	144.186	0.144186
3	36.8	syzcum	0.7	0.7	610.631	293.103	0.293103
3	33	syzcum	0.7	0.7	466.989	224.155	0.224155
3	45.1	syzcum	0.7	0.7	1005.31	482.549	0.482549	2.79232	155.129

## Sheet: CWD_carbon
plot	transect	d	V_m3/ha	V_cm3/ha	decay_class	ρ	biomass_g/ha	biomass_g/ha_per_transect	per_C	C_g/ha_per_transect	C_Mg/ha_per_transect	C_Mg/ha_plot		transect	five, 15-m transects per plot (1-5)
1	1	8	5.26379	5.26379e+06	3	0.16	842206		0.48	0	0			d	diameter where coarse woody debris (CWD) intersects transect
1	1	9	6.66198	6.66198e+06	3	0.16	1.06592e+06		0.48	0	0			V_m3/ha	volume (m3/ha) based on equation from Iwashita et al. 2013 (see below)
1	1	28.6	67.2745	6.72745e+07	3	0.16	1.07639e+07		0.48	0	0			V_cm3/ha	converted to cm3/ha
1	1	7	4.03009	4.03009e+06	3	0.16	644814	1.33169e+07	0.48	6.39209e+06	6.39209			decay_class	field measurements characterized based on Iwashita et al. 2013
1	2	4	1.31595	1.31595e+06	2	0.39	513219		0.48	0	0			ρ	wood density (g/cm3) per decay class) based on Iwashita et al. 2013 **
1	2	9	6.66198	6.66198e+06	2	0.39	2.59817e+06		0.48	0	0			biomass_g/ha	biomass per CWD (g/ha)
1	2	5	2.05617	2.05617e+06	2	0.39	801905		0.48	0	0			biomass_g/ha_per transect	biomass per transect (g/ha)
1	2	25	51.4042	5.14042e+07	2	0.39	2.00476e+07		0.48	0	0			per_C	percent carbon based on assumed 48% from Iwashita et al. 2013
1	2	4	1.31595	1.31595e+06	2	0.39	513219		0.48	0	0			C_g/ha_per_transect	CWD carbon per tarnsect g/ha
1	2	23	43.5085	4.35085e+07	3	0.16	6.96136e+06		0.48	0	0			C_Mg/ha_per_transect	CWD carbon per transect scaled to Mg/ha
1	2	5	2.05617	2.05617e+06	3	0.16	328987		0.48	0	0			C_Mg/ha_plot	CWD carbon (Mg/ha) by plot (average of transects)
1	2	3	0.74022	740220	3	0.16	118435		0.48	0	0
1	2	16	21.0552	2.10552e+07	4	0.07	1.47386e+06		0.48	0	0			*CWD equation and decay class density values from Iwashita et al. 2013		**Decay class	ρ
1	2	16	21.0552	2.10552e+07	4	0.07	1.47386e+06		0.48	0	0					1	0.69
1	2	3	0.74022	740220	4	0.07	51815.4	3.48825e+07	0.48	1.67436e+07	16.7436					2	0.39
1	3	19	29.6911	2.96911e+07	2	0.39	1.15795e+07		0.48	0	0					3	0.16
1	3	10	8.22467	8.22467e+06	2	0.39	3.20762e+06		0.48	0	0					4	0.07
1	3	13	13.8997	1.38997e+07	3	0.16	2.22395e+06		0.48	0	0			V = volume in m3/ha
1	3	2.5	0.514042	514042	3	0.16	82246.7		0.48	0	0			d= diameter in cm from intersection
1	3	4	1.31595	1.31595e+06	3	0.16	210552		0.48	0	0			L= transect length=15 m
1	3	3	0.74022	740220	3	0.16	118435		0.48	0	0			pi
1	3	7	4.03009	4.03009e+06	3	0.16	644814		0.48	0	0			3.14159
1	3	4	1.31595	1.31595e+06	3	0.16	210552		0.48	0	0
1	3	3	0.74022	740220	3	0.16	118435		0.48	0	0
1	3	6	2.96088	2.96088e+06	4	0.07	207262		0.48	0	0
1	3	5	2.05617	2.05617e+06	4	0.07	143932		0.48	0	0
1	3	7	4.03009	4.03009e+06	4	0.07	282106	1.90294e+07	0.48	9.13412e+06	9.13412
1	4	4	1.31595	1.31595e+06	1	0.69	908004		0.48	0	0
1	4	9	6.66198	6.66198e+06	2	0.39	2.59817e+06		0.48	0	0
1	4	24.5	49.3686	4.93686e+07	2	0.39	1.92537e+07		0.48	0	0
1	4	9	6.66198	6.66198e+06	2	0.39	2.59817e+06		0.48	0	0
1	4	9	6.66198	6.66198e+06	2	0.39	2.59817e+06		0.48	0	0
1	4	10	8.22467	8.22467e+06	2	0.39	3.20762e+06		0.48	0	0
1	4	4	1.31595	1.31595e+06	2	0.39	513219		0.48	0	0
1	4	9	6.66198	6.66198e+06	3	0.16	1.06592e+06		0.48	0	0
1	4	10	8.22467	8.22467e+06	3	0.16	1.31595e+06		0.48	0	0
1	4	5	2.05617	2.05617e+06	3	0.16	328987		0.48	0	0
1	4	9	6.66198	6.66198e+06	3	0.16	1.06592e+06		0.48	0	0
1	4	4	1.31595	1.31595e+06	3	0.16	210552		0.48	0	0
1	4	17	23.7693	2.37693e+07	4	0.07	1.66385e+06		0.48	0	0
1	4	5	2.05617	2.05617e+06	4	0.07	143932		0.48	0	0
1	4	4	1.31595	1.31595e+06	4	0.07	92116.3	3.75643e+07	0.48	1.80309e+07	18.0309
1	5	3	0.74022	740220	2	0.39	288686		0.48	0	0
1	5	5	2.05617	2.05617e+06	3	0.16	328987		0.48	0	0
1	5	5	2.05617	2.05617e+06	3	0.16	328987	946660	0.48	454397	0.454397	10.151
2	1	4	1.31595	1.31595e+06	2	0.39	513219	513219	0.48	246345	0.246345
2	2	4	1.31595	1.31595e+06	1	0.69	908004		0.48	0	0
2	2	3	0.74022	740220	1	0.69	510752		0.48	0	0
2	2	8.4	5.80333	5.80333e+06	1	0.69	4.0043e+06		0.48	0	0
2	2	5	2.05617	2.05617e+06	3	0.16	328987		0.48	0	0
2	2	6	2.96088	2.96088e+06	3	0.16	473741	6.22578e+06	0.48	2.98837e+06	2.98837
2	3	19	29.6911	2.96911e+07	3	0.16	4.75057e+06		0.48	0	0
2	3	3	0.74022	740220	3	0.16	118435	4.869e+06	0.48	2.33712e+06	2.33712
2	4	3	0.74022	740220	2	0.39	288686		0.48	0	0
2	4	11	9.95185	9.95185e+06	3	0.16	1.5923e+06		0.48	0	0
2	4	3.5	1.00752	1.00752e+06	3	0.16	161204	2.04219e+06	0.48	980249	0.980249
2	5	2.5	0.514042	514042	2	0.39	200476		0.48	0	0
2	5	2.5	0.514042	514042	3	0.16	82246.7	282723	0.48	135707	0.135707	1.33756
3	1	3	0.74022	740220	1	0.69	510752		0.48	0	0
3	1	6	2.96088	2.96088e+06	2	0.39	1.15474e+06		0.48	0	0
3	1	6	2.96088	2.96088e+06	3	0.16	473741		0.48	0	0
3	1	3	0.74022	740220	3	0.16	118435		0.48	0	0
3	1	14	16.1204	1.61204e+07	3	0.16	2.57926e+06		0.48	0	0
3	1	5	2.05617	2.05617e+06	4	0.07	143932	4.98086e+06	0.48	2.39081e+06	2.39081
3	2	2	0.328987	328987	2	0.39	128305		0.48	0	0
3	2	2	0.328987	328987	2	0.39	128305		0.48	0	0
3	2	6	2.96088	2.96088e+06	3	0.16	473741		0.48	0	0
3	2	3	0.74022	740220	3	0.16	118435		0.48	0	0
3	2	3	0.74022	740220	3	0.16	118435		0.48	0	0
3	2	4	1.31595	1.31595e+06	3	0.16	210552		0.48	0	0
3	2	2	0.328987	328987	4	0.07	23029.1	1.2008e+06	0.48	576385	0.576385
3	3	5	2.05617	2.05617e+06	2	0.39	801905		0.48	0	0
3	3	4	1.31595	1.31595e+06	2	0.39	513219		0.48	0	0
3	3	5	2.05617	2.05617e+06	2	0.39	801905		0.48	0	0
3	3	6	2.96088	2.96088e+06	3	0.16	473741		0.48	0	0
3	3	5	2.05617	2.05617e+06	3	0.16	328987		0.48	0	0
3	3	9	6.66198	6.66198e+06	3	0.16	1.06592e+06		0.48	0	0
3	3	19.4	30.9544	3.09544e+07	3	0.16	4.9527e+06		0.48	0	0
3	3	4	1.31595	1.31595e+06	4	0.07	92116.3		0.48	0	0
3	3	10	8.22467	8.22467e+06	4	0.07	575727	9.60622e+06	0.48	4.61098e+06	4.61098
3	4	8	5.26379	5.26379e+06	2	0.39	2.05288e+06		0.48	0	0
3	4	3	0.74022	740220	3	0.16	118435		0.48	0	0
3	4	7	4.03009	4.03009e+06	3	0.16	644814		0.48	0	0
3	4	4	1.31595	1.31595e+06	3	0.16	210552	3.02668e+06	0.48	1.45281e+06	1.45281
3	5	6.5	3.47492	3.47492e+06	3	0.16	555988		0.48	0	0
3	5	15	18.5055	1.85055e+07	3	0.16	2.96088e+06		0.48	0	0
3	5	4	1.31595	1.31595e+06	3	0.16	210552		0.48	0	0
3	5	18	26.6479	2.66479e+07	3	0.16	4.26367e+06	7.99109e+06	0.48	3.83572e+06	3.83572	2.57334

## Sheet: litter_carbon 
Plot	biomass_g_0.25m2	C_g_0.25m2	C_Mg/ha	C_plot_Mg/ha		biomass_g_0.25m2	dry mass of litter (g) 0.25 m2 subplot
1	108.27	51.9696	2.07878			C_g_0.25m2	mass C of subplot assuming 48% carbon in litter (based on Iwashita et al. 2013)
1	109.28	52.4544	2.09818			C_Mg/ha	mass C scaled to Mg/ha
1	78.99	37.9152	1.51661			C_plot_Mg/ha	litter C per plot (Mg/ha); mean of 6 subplots
1	390.71	187.541	7.50163
1	135.54	65.0592	2.60237
1	38.52	18.4896	0.739584	2.75619
2	154.61	74.2128	2.96851
2	124.44	59.7312	2.38925
2	51.47	24.7056	0.988224
2	105.13	50.4624	2.0185
2	139.8	67.104	2.68416
2	77.91	37.3968	1.49587	2.09075
3	129	61.92	2.4768
3	112.76	54.1248	2.16499
3	96.95	46.536	1.86144
3	130.04	62.4192	2.49677
3	117.55	56.424	2.25696
3	93.23	44.7504	1.79002	2.1745
